# Supplementary material
Source: publisher figshare collection journal article supplement (https://tandf.figshare.com/ndownloader/files/16777493)
Supplement: Supplementary file 1 [file 16777493]

Enhancement in C-OH peak

Enhancement in OH peak

(a)





Enhancement in C=O peak

peak

Enhancement in OH peak

(b)





Enhancement in Imidazolium peak

peak

(c)





Enhancement in Imidazolium peak

peak

(d)

**Supplementary Figure 1:** **(a)** Enhancement of carbonyl peak intensity for HEMA modified membranes; **(b)** Enhancement of carbonyl peak intensity for AA modified membranes; **(c)** Enhancement of imidazolium peak intensity for allyl modified membranes; **(d)** Enhancement of imidazolium peak intensity for bromo modified membranes.








**(a)**

**(b)**








**(c)**

**(d)**





**(e)**

**Supplementary Figure 2:** Flux versus distillate volume for consecutive DCMD cycles (a) base PP membrane; (b) HEMA modified membrane; (c) AA modified membrane; (d) allyl modified membrane; (e) hexyl modified membrane. For modified membranes the polymerization time was 5 min.





**Supplementary Figure 3:** Flux as a function of distillate volume for 2nd DCMD cycle. For modified membranes the polymerization time was 10 min.
